# Supplementary material
Source: PubMed Central journal article supplement (PMC3922294)
Supplement: NIHMS546423-supplement-01.pdf [file NIHMS546423-supplement-01.pdf]

Type of file: figure

Label:

Filename: Zucchelli\_Supplementary\_Figure\_1.pdf

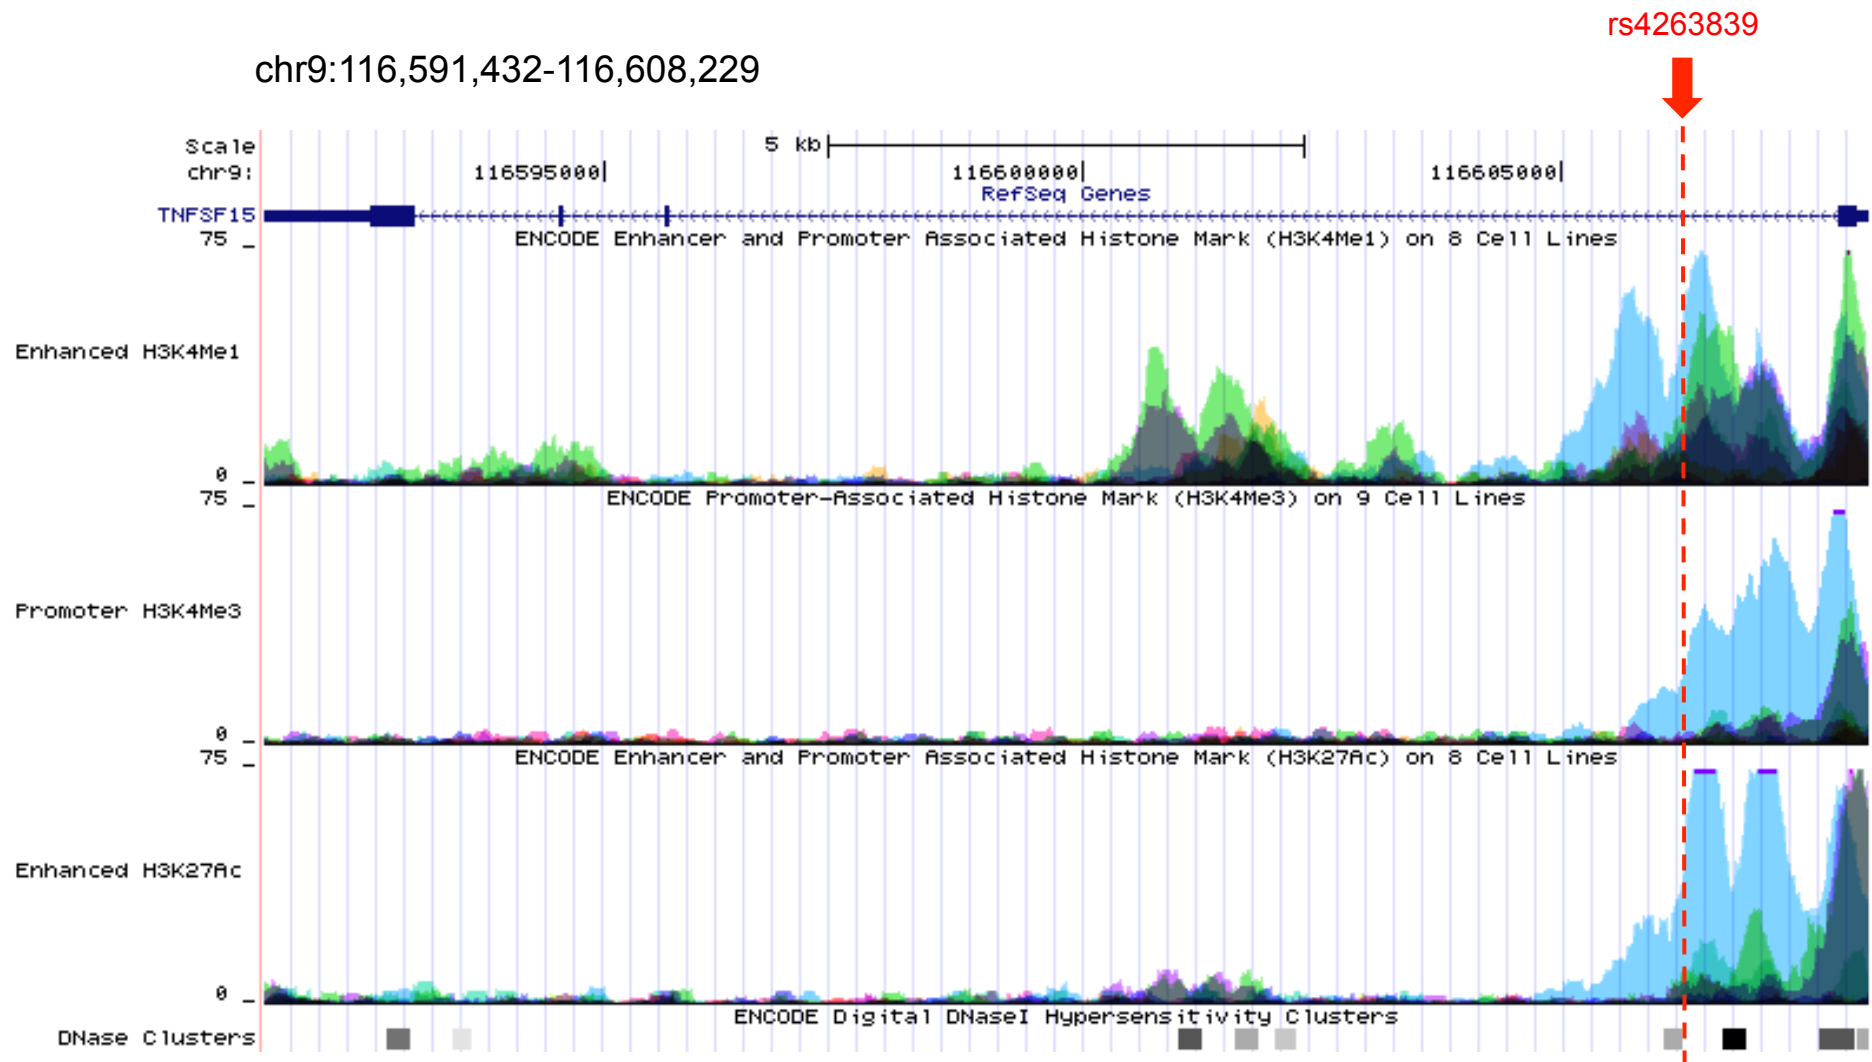

**Supplementary Figure 1.** Summary of ENCODE data for the TNFSF15 locus. The UCSC Human Genome Browser (<http://genome.ucsc.edu>) was used to produce a graphical representation of histone (H3K4Me1 and H3K4Me3), acetylation (H3K27Ac) and DNase hypersensitive (DNase clusters) marks influencing chromatin accessibility, which is associated with enhancers, promoters, and DNA regions of active transcription. Genomic coordinates of the region shown are reported in the top left corner, and the position of the rs4263839 SNP along the TNFSF15 gene is indicated by a red arrow and a vertical dashed line. See <http://www.genome.gov/10005107> for a detailed description of the ENCODE project; ENCODE data can be accessed via <http://genome.ucsc.edu/ENCODE>.

Type of file: figure

Label: a

Filename: Zucchelli\_Supplementary\_Figure\_2.pdf

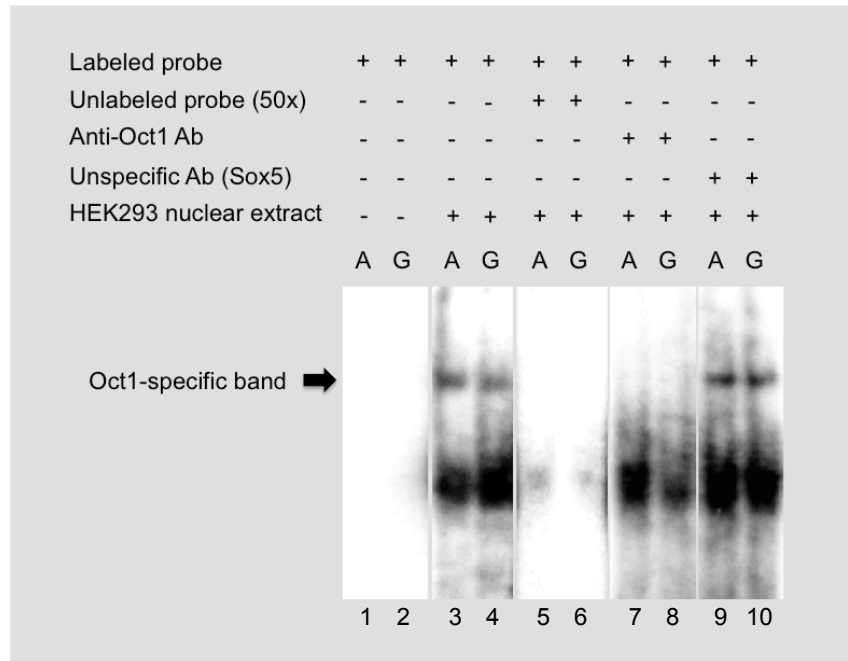

**Supplementary Figure 2.** Analysis of *TNFSF15* rs4263839 SNP by Electrophoretic Mobility Shift Assay (EMSA). Oligonucleotide duplexes corresponding to the alleles (A and G) at the rs4263839 polymorphism were labeled with  $^{32}\text{P}$ -ATP and incubated with nuclear extracts from HEK293 cells in the presence or absence of unlabeled probes, and specific antibodies as indicated. Specificity of binding (as from lanes 3 and 4) was confirmed by running duplexes alone (lanes 1 and 2), in combination with excess cold competitor (lanes 4 and 5), and by supershift analysis with an antibody directed vs human Oct-1 (lanes 7 and 8). No supershift (band still present) was observed with an unspecific antibody directed vs human Sox5 (lanes 9 and 10). Overall, no different EMSA pattern was observed for the two alleles in any of the tested conditions.

Type of file: table

Label:

Filename: Zucchelli\_Supplementary\_Tables\_1-4.pdf

**Supplementary Table 1.** Association of Crohn's disease risk loci with irritable bowel syndrome (IBS)

| Marker ID  | Chr   | Nearest Gene | SNP   | Risk allele | Total sample          |                  | Sweden        |                  | USA           |                  |
|------------|-------|--------------|-------|-------------|-----------------------|------------------|---------------|------------------|---------------|------------------|
|            |       |              |       |             | P                     | OR (95%CI)       | P             | OR (95%CI)       | P             | OR (95%CI)       |
| rs2476601  | 1p13  | PTPN22       | G/a   | G           | 0.55                  | 1.08 (0.85-1.35) | 0.33          | 1.15 (0.87-1.52) | 0.73          | 0.93 (0.63-1.38) |
| rs11465804 | 1p31  | IL23R        | T/g   | T           | 0.75                  | 0.94 (0.68-1.30) | 0.071         | 1.49 (0.95-2.34) | <i>0.0060</i> | 0.45 (0.25-0.83) |
| rs2274910  | 1q23  | ITLN1        | C/t   | C           | 0.48                  | 1.05 (0.91-1.22) | 0.97          | 1.00 (0.83-1.21) | 0.26          | 1.15 (0.90-1.47) |
| rs9286879  | 1q24  | TNFSF18      | A/g   | G           | 0.73                  | 1.03 (0.87-1.21) | 0.73          | 1.04 (0.84-1.28) | 0.94          | 0.99 (0.75-1.30) |
| rs11584383 | 1q32  | C1orf81      | T/c   | T           | 0.19                  | 1.10 (0.95-1.27) | 0.43          | 1.08 (0.89-1.29) | 0.33          | 1.14 (0.88-1.46) |
| rs3828309  | 2q37  | ATG16L1      | G/a   | G           | 0.99                  | 1.00 (0.87-1.15) | 0.59          | 0.95 (0.80-1.13) | 0.54          | 1.08 (0.85-1.35) |
| rs3197999  | 3p21  | MST1         | G/a   | A           | 0.54                  | 1.05 (0.90-1.22) | 0.43          | 1.08 (0.89-1.31) | 0.92          | 1.01 (0.78-1.31) |
| rs4613763  | 5p13  | PTGER4       | T/c   | C           | 0.27                  | 0.90 (0.74-1.09) | 0.12          | 0.82 (0.64-1.05) | 0.64          | 1.08 (0.77-1.51) |
| rs2188962  | 5q31  | C5orf56      | C/t   | T           | 0.96                  | 1.00 (0.86-1.15) | 0.26          | 0.90 (0.75-1.08) | 0.16          | 1.18 (0.93-1.50) |
| rs10045431 | 5q33  | IL12B        | C/a   | C           | 0.30                  | 1.09 (0.93-1.28) | 0.52          | 1.06 (0.88-1.29) | 0.42          | 1.11 (0.85-1.44) |
| rs11747270 | 5q33  | IRGM         | A/g   | G           | 0.89                  | 1.02 (0.78-1.34) | 0.061         | 1.40 (0.99-1.98) | 0.051         | 0.66 (0.44-1.00) |
| rs6908425  | 6p22  | CDKAL1       | C/t   | C           | 0.55                  | 0.95 (0.80-1.13) | 0.38          | 0.91 (0.74-1.12) | 0.92          | 1.01 (0.76-1.35) |
| rs7746082  | 6q21  | PRDM1        | G/c   | C           | 0.71                  | 1.03 (0.88-1.21) | 0.24          | 0.89 (0.72-1.08) | <i>0.031</i>  | 1.34 (1.02-1.75) |
| rs2301436  | 6q27  | CCR6         | C/t   | T           | 0.089                 | 0.88 (0.76-1.02) | 0.28          | 0.90 (0.74-1.09) | 0.20          | 0.86 (0.68-1.08) |
| rs1456893  | 7p12  | IKZF1        | A/g   | A           | 0.90                  | 0.99 (0.85-1.16) | 0.36          | 1.10 (0.90-1.34) | 0.15          | 0.83 (0.64-1.07) |
| rs1551398  | 8q24  | TRIB1        | A/g   | A           | 0.36                  | 1.08 (0.93-1.25) | 0.21          | 1.12 (0.93-1.35) | 0.92          | 1.01 (0.80-1.28) |
| rs10758669 | 9p24  | JAK2         | A/c   | C           | 0.79                  | 0.98 (0.85-1.14) | 0.55          | 0.95 (0.79-1.13) | 0.75          | 1.04 (0.81-1.33) |
| rs4263839  | 9q32  | TNFSF15      | G/a   | G           | <b><i>2.2E-05</i></b> | 1.37 (1.19-1.58) | <i>0.0033</i> | 1.32 (1.10-1.58) | <i>0.0027</i> | 1.45 (1.14-1.85) |
| rs17582416 | 10p11 | CUL2         | T/g   | G           | 0.95                  | 1.00 (0.86-1.15) | 0.97          | 1.00 (0.83-1.19) | 0.80          | 0.97 (0.76-1.24) |
| rs10995271 | 10q21 | ZNF365       | G/c   | C           | 0.89                  | 1.01 (0.87-1.17) | 0.68          | 0.96 (0.80-1.15) | 0.42          | 1.11 (0.86-1.42) |
| rs11190140 | 10q24 | NKX2-3       | C/t   | T           | 0.55                  | 0.96 (0.83-1.10) | 0.91          | 0.99 (0.83-1.18) | 0.36          | 0.90 (0.71-1.13) |
| rs7927894  | 11q13 | C11orf30     | C/t   | T           | 0.79                  | 0.98 (0.85-1.14) | 0.96          | 1.00 (0.83-1.21) | 0.63          | 0.94 (0.74-1.20) |
| rs11175593 | 12q12 | LRRK2        | C/t   | T           | 0.12                  | 0.64 (0.36-1.13) | 0.89          | 0.94 (0.42-2.14) | 0.059         | 0.48 (0.23-1.02) |
| rs3764147  | 13q14 | C13orf31     | A/g   | G           | 0.22                  | 0.90 (0.75-1.07) | 0.11          | 0.83 (0.66-1.05) | 0.94          | 1.01 (0.77-1.33) |
| rs2066844  | 16q12 | NOD2         | C/t   | T           | -                     | -                | -             | -                | 0.92          | 0.97 (0.53-1.79) |
| rs2066847  | 16q12 | NOD2         | DEL/c | C           | -                     | -                | 0.14          | 0.57 (0.27-1.21) | -             | -                |
| rs2872507  | 17q12 | ORMDL3       | G/a   | A           | 0.82                  | 0.98 (0.85-1.13) | 0.88          | 0.99 (0.83-1.18) | 0.84          | 0.98 (0.77-1.24) |
| rs744166   | 17q21 | STAT3        | A/g   | A           | 0.13                  | 1.11 (0.97-1.27) | 0.10          | 1.16 (0.97-1.39) | 0.76          | 1.04 (0.82-1.32) |
| rs2542151  | 18p11 | PTPN2        | T/g   | G           | 0.77                  | 1.03 (0.85-1.25) | 0.52          | 1.08 (0.85-1.39) | 0.67          | 0.94 (0.69-1.27) |
| rs1736135  | 21q21 | USP25        | T/c   | T           | 0.082                 | 1.14 (0.98-1.32) | 0.082         | 1.16 (0.98-1.38) | 0.54          | 1.08 (0.85-1.35) |
| rs762421   | 21q22 | ICOSLG       | A/g   | G           | 0.27                  | 1.08 (0.94-1.25) | 0.98          | 1.00 (0.83-1.19) | 0.069         | 1.24 (0.98-1.58) |

Lower case indicates minor allele at each SNP. Significant P values are reported in italics, with those withstanding Bonferroni correction for multiple tests also in bold type.

**Supplementary Table 2.** Association of Crohn's disease risk loci with constipation-predominant irritable bowel syndrome (IBS-C)

| Marker ID  | Chr   | Nearest Gene | SNP   | Risk allele | Total sample          |                  | Sweden        |                  | USA                   |                  |
|------------|-------|--------------|-------|-------------|-----------------------|------------------|---------------|------------------|-----------------------|------------------|
|            |       |              |       |             | P                     | OR (95%CI)       | P             | OR (95%CI)       | P                     | OR (95%CI)       |
| rs2476601  | 1p13  | PTPN22       | G/a   | G           | 0.91                  | 0.98 (0.70-1.36) | 0.81          | 1.05 (0.67-1.65) | 0.68                  | 0.90 (0.55-1.47) |
| rs11465804 | 1p31  | IL23R        | T/g   | T           | 0.16                  | 0.71 (0.45-1.14) | 0.56          | 0.83 (0.45-1.53) | 0.19                  | 0.53 (0.24-1.18) |
| rs2274910  | 1q23  | ITLN1        | C/t   | C           | 0.14                  | 1.19 (0.94-1.50) | 0.27          | 1.19 (0.87-1.63) | 0.30                  | 1.19 (0.85-1.66) |
| rs9286879  | 1q24  | TNFSF18      | A/g   | G           | 0.98                  | 1.00 (0.78-1.29) | 0.90          | 1.02 (0.72-1.45) | 0.96                  | 0.99 (0.69-1.42) |
| rs11584383 | 1q32  | C1orf81      | T/c   | T           | 0.38                  | 1.11 (0.88-1.41) | 0.98          | 1.00 (0.72-1.39) | 0.19                  | 1.25 (0.89-1.75) |
| rs3828309  | 2q37  | ATG16L1      | G/a   | G           | 0.46                  | 1.09 (0.88-1.35) | 0.72          | 0.94 (0.70-1.26) | 0.14                  | 1.27 (0.93-1.73) |
| rs3197999  | 3p21  | MST1         | G/a   | A           | 0.14                  | 1.19 (0.95-1.49) | 0.11          | 1.29 (0.95-1.76) | 0.67                  | 1.07 (0.77-1.50) |
| rs4613763  | 5p13  | PTGER4       | T/c   | C           | 0.34                  | 0.86 (0.63-1.17) | 0.42          | 0.84 (0.55-1.29) | 0.53                  | 0.87 (0.56-1.36) |
| rs2188962  | 5q31  | C5orf56      | C/t   | T           | 0.54                  | 1.07 (0.86-1.33) | 1.00          | 1.00 (0.74-1.36) | 0.37                  | 1.15 (0.84-1.57) |
| rs10045431 | 5q33  | IL12B        | C/a   | C           | 0.15                  | 1.19 (0.93-1.52) | 0.55          | 1.11 (0.79-1.56) | 0.14                  | 1.30 (0.92-1.84) |
| rs11747270 | 5q33  | IRGM         | A/g   | G           | 0.98                  | 1.01 (0.67-1.51) | 0.16          | 1.52 (0.87-2.68) | 0.22                  | 0.71 (0.41-1.24) |
| rs6908425  | 6p22  | CDKAL1       | C/t   | C           | 0.75                  | 1.04 (0.80-1.36) | 0.76          | 1.06 (0.74-1.54) | 0.88                  | 1.03 (0.70-1.51) |
| rs7746082  | 6q21  | PRDM1        | G/c   | C           | 0.94                  | 0.99 (0.78-1.26) | 0.31          | 0.84 (0.59-1.19) | 0.39                  | 1.16 (0.82-1.63) |
| rs2301436  | 6q27  | CCR6         | C/t   | T           | 0.67                  | 1.05 (0.84-1.31) | 0.80          | 1.04 (0.75-1.45) | 0.75                  | 0.95 (0.70-1.29) |
| rs1456893  | 7p12  | IKZF1        | A/g   | A           | 0.35                  | 0.89 (0.71-1.12) | 0.79          | 1.04 (0.75-1.44) | 0.10                  | 0.76 (0.54-1.06) |
| rs1551398  | 8q24  | TRIB1        | A/g   | A           | 0.16                  | 1.18 (0.93-1.48) | 0.29          | 1.19 (0.86-1.64) | 0.40                  | 1.15 (0.83-1.59) |
| rs10758669 | 9p24  | JAK2         | A/c   | C           | 0.26                  | 0.88 (0.71-1.10) | <i>0.038</i>  | 0.72 (0.52-0.99) | 0.61                  | 1.09 (0.79-1.48) |
| rs4263839  | 9q32  | TNFSF15      | G/a   | G           | <b><i>8.7E-07</i></b> | 1.79 (1.41-2.26) | <i>0.0010</i> | 1.72 (1.23-2.41) | <b><i>1.9E-04</i></b> | 1.85 (1.33-2.57) |
| rs17582416 | 10p11 | CUL2         | T/g   | G           | 0.99                  | 1.00 (0.80-1.24) | 0.94          | 1.01 (0.75-1.37) | 0.94                  | 0.99 (0.72-1.35) |
| rs10995271 | 10q21 | ZNF365       | G/c   | C           | 0.87                  | 0.98 (0.79-1.23) | 0.60          | 0.92 (0.68-1.25) | 0.71                  | 1.07 (0.76-1.48) |
| rs11190140 | 10q24 | NKX2-3       | C/t   | T           | 0.11                  | 0.84 (0.68-1.04) | 0.13          | 0.79 (0.59-1.07) | 0.49                  | 0.90 (0.66-1.22) |
| rs7927894  | 11q13 | C11orf30     | C/t   | T           | 0.96                  | 1.01 (0.80-1.26) | 0.60          | 0.92 (0.67-1.26) | 0.56                  | 1.10 (0.80-1.51) |
| rs11175593 | 12q12 | LRRK2        | C/t   | T           | 0.089                 | 0.48 (0.19-1.18) | 0.78          | 0.40 (0.05-3.13) | 0.16                  | 0.49 (0.18-1.38) |
| rs3764147  | 13q14 | C13orf31     | A/g   | G           | 0.75                  | 0.96 (0.74-1.24) | 0.51          | 0.88 (0.59-1.30) | 0.89                  | 1.03 (0.72-1.46) |
| rs2066844  | 16q12 | NOD2         | C/t   | T           | -                     | -                | -             | -                | 0.70                  | 1.16 (0.54-2.52) |
| rs2066847  | 16q12 | NOD2         | DEL/c | C           | -                     | -                | 0.33          | 0.48 (0.11-2.09) | -                     | -                |
| rs2872507  | 17q12 | ORMDL3       | G/a   | A           | 0.51                  | 0.93 (0.75-1.15) | 0.69          | 1.06 (0.79-1.43) | 0.15                  | 0.80 (0.58-1.09) |
| rs744166   | 17q21 | STAT3        | A/g   | A           | 0.96                  | 1.01 (0.81-1.25) | 0.86          | 0.97 (0.73-1.29) | 0.78                  | 1.04 (0.76-1.42) |
| rs2542151  | 18p11 | PTPN2        | T/g   | G           | 0.30                  | 0.85 (0.63-1.16) | 0.95          | 1.01 (0.66-1.56) | 0.13                  | 0.72 (0.47-1.11) |
| rs1736135  | 21q21 | USP25        | T/c   | T           | 0.22                  | 1.14 (0.93-1.39) | 0.21          | 1.20 (0.90-1.61) | 0.64                  | 1.08 (0.79-1.46) |
| rs762421   | 21q22 | ICOSLG       | A/g   | G           | 0.68                  | 1.05 (0.84-1.30) | 0.66          | 0.93 (0.69-1.27) | 0.29                  | 1.18 (0.87-1.61) |

Lower case indicates minor allele at each SNP. Significant P values are reported in italics, with those withstanding Bonferroni correction for multiple tests also in bold type.

**Supplementary Table3.** Association of Crohn's disease risk loci with diarrhea-predominant irritable bowel syndrome (IBS-D)

| Marker ID  | Chr   | Nearest Gene | SNP   | Risk allele | Total sample  |                  | Sweden        |                  | USA           |                  |
|------------|-------|--------------|-------|-------------|---------------|------------------|---------------|------------------|---------------|------------------|
|            |       |              |       |             | P             | OR (95%CI)       | P             | OR (95%CI)       | P             | OR (95%CI)       |
| rs2476601  | 1p13  | PTPN22       | G/a   | G           | 0.74          | 1.05 (0.78-1.43) | 0.38          | 1.20 (0.79-1.83) | 0.62          | 0.88 (0.56-1.40) |
| rs11465804 | 1p31  | IL23R        | T/g   | T           | 0.91          | 0.97 (0.63-1.51) | <i>0.0053</i> | 3.13 (1.22-8.01) | <i>0.0086</i> | 0.42 (0.22-0.82) |
| rs2274910  | 1q23  | ITLN1        | C/t   | C           | 0.46          | 1.08 (0.88-1.32) | 0.60          | 0.93 (0.71-1.21) | 0.12          | 1.27 (0.93-1.71) |
| rs9286879  | 1q24  | TNFSF18      | A/g   | G           | 0.58          | 1.07 (0.85-1.34) | 0.37          | 1.15 (0.85-1.55) | 0.57          | 0.91 (0.65-1.27) |
| rs11584383 | 1q32  | C1orf81      | T/c   | T           | 0.17          | 1.15 (0.93-1.41) | 0.57          | 1.09 (0.82-1.44) | 0.25          | 1.19 (0.88-1.62) |
| rs3828309  | 2q37  | ATG16L1      | G/a   | G           | 0.48          | 0.93 (0.77-1.14) | 0.59          | 0.93 (0.71-1.21) | 0.65          | 0.93 (0.71-1.22) |
| rs3197999  | 3p21  | MST1         | G/a   | A           | 0.54          | 1.07 (0.87-1.32) | 0.48          | 1.11 (0.83-1.47) | 0.81          | 1.04 (0.76-1.42) |
| rs4613763  | 5p13  | PTGER4       | T/c   | C           | 0.82          | 0.97 (0.75-1.26) | 0.58          | 0.90 (0.63-1.30) | 0.57          | 1.12 (0.76-1.65) |
| rs2188962  | 5q31  | C5orf56      | C/t   | T           | 0.51          | 1.07 (0.88-1.30) | 0.68          | 0.95 (0.72-1.24) | 0.13          | 1.26 (0.94-1.69) |
| rs10045431 | 5q33  | IL12B        | C/a   | C           | 0.96          | 0.99 (0.80-1.23) | 0.73          | 0.95 (0.71-1.27) | 0.85          | 1.03 (0.75-1.42) |
| rs11747270 | 5q33  | IRGM         | A/g   | G           | 0.62          | 0.91 (0.62-1.33) | 0.28          | 1.33 (0.80-2.22) | 0.11          | 0.66 (0.39-1.12) |
| rs6908425  | 6p22  | CDKAL1       | C/t   | C           | <i>0.038</i>  | 0.78 (0.62-0.98) | <i>0.021</i>  | 0.69 (0.51-0.95) | 0.54          | 0.89 (0.63-1.26) |
| rs7746082  | 6q21  | PRDM1        | G/c   | C           | 0.33          | 1.11 (0.90-1.38) | 0.53          | 0.91 (0.67-1.22) | <i>0.039</i>  | 1.40 (1.02-1.92) |
| rs2301436  | 6q27  | CCR6         | C/t   | T           | <i>0.0019</i> | 0.72 (0.58-0.89) | <i>0.014</i>  | 0.68 (0.50-0.93) | 0.069         | 1.30 (0.98-1.72) |
| rs1456893  | 7p12  | IKZF1        | A/g   | A           | 0.71          | 0.96 (0.78-1.19) | 0.47          | 1.11 (0.83-1.48) | 0.16          | 0.79 (0.58-1.09) |
| rs1551398  | 8q24  | TRIB1        | A/g   | A           | 0.78          | 0.97 (0.79-1.19) | 0.47          | 1.11 (0.83-1.48) | 0.42          | 0.88 (0.67-1.17) |
| rs10758669 | 9p24  | JAK2         | A/c   | C           | 0.70          | 0.96 (0.79-1.17) | 0.65          | 0.94 (0.72-1.23) | 0.74          | 0.95 (0.71-1.28) |
| rs4263839  | 9q32  | TNFSF15      | G/a   | G           | 0.038         | 1.23 (1.01-1.51) | 0.34          | 1.15 (0.87-1.52) | 0.072         | 1.32 (0.97-1.78) |
| rs17582416 | 10p11 | CUL2         | T/g   | G           | 0.98          | 1.00 (0.82-1.22) | 0.94          | 1.01 (0.77-1.32) | 0.74          | 0.95 (0.71-1.27) |
| rs10995271 | 10q21 | ZNF365       | G/c   | C           | 0.61          | 1.05 (0.86-1.29) | 0.93          | 1.01 (0.77-1.32) | 0.54          | 1.10 (0.82-1.48) |
| rs11190140 | 10q24 | NKX2-3       | C/t   | T           | 0.47          | 0.93 (0.77-1.13) | 0.46          | 0.91 (0.70-1.18) | 0.70          | 0.95 (0.71-1.26) |
| rs7927894  | 11q13 | C11orf30     | C/t   | T           | 0.35          | 0.91 (0.74-1.11) | 0.65          | 0.94 (0.72-1.23) | 0.35          | 0.87 (0.64-1.17) |
| rs11175593 | 12q12 | LRRK2        | C/t   | T           | 0.41          | 0.74 (0.36-1.53) | 0.83          | 1.14 (0.36-3.57) | 0.30          | 0.63 (0.26-1.55) |
| rs3764147  | 13q14 | C13orf31     | A/g   | G           | 0.56          | 0.93 (0.74-1.18) | 0.14          | 0.77 (0.54-1.10) | 0.44          | 1.14 (0.82-1.58) |
| rs2066844  | 16q12 | NOD2         | C/t   | T           | -             | -                | -             | -                | 0.99          | 1.00 (0.48-2.07) |
| rs2066847  | 16q12 | NOD2         | DEL/c | C           | -             | -                | 0.33          | 0.54 (0.16-1.86) | -             | -                |
| rs2872507  | 17q12 | ORMDL3       | G/a   | A           | 0.82          | 0.98 (0.81-1.19) | 0.45          | 0.90 (0.70-1.17) | 0.55          | 1.09 (0.82-1.45) |
| rs744166   | 17q21 | STAT3        | A/g   | A           | 0.39          | 1.09 (0.90-1.31) | 0.57          | 1.08 (0.83-1.39) | 0.50          | 1.10 (0.83-1.46) |
| rs2542151  | 18p11 | PTPN2        | T/g   | G           | 0.31          | 1.14 (0.88-1.48) | 0.17          | 1.28 (0.90-1.82) | 0.86          | 0.97 (0.67-1.40) |
| rs1736135  | 21q21 | USP25        | T/c   | T           | 0.064         | 1.20 (0.99-1.47) | 0.052         | 1.30 (1.00-1.69) | 0.53          | 1.10 (0.83-1.46) |
| rs762421   | 21q22 | ICOSLG       | A/g   | G           | 0.30          | 1.11 (0.91-1.35) | 0.91          | 1.02 (0.78-1.32) | 0.23          | 1.19 (0.89-1.59) |

Lower case indicates minor allele at each SNP. Significant P values are reported in italics, with those withstanding Bonferroni correction for multiple tests also in bold type.



**Supplementary Table 4.** Association of Crohn's disease risk loci with alternating irritable bowel syndrome (IBS-A)

| Marker ID  | Chr   | Nearest Gene | SNP   | Risk allele | Total sample |                  | Sweden       |                  | USA   |                  |
|------------|-------|--------------|-------|-------------|--------------|------------------|--------------|------------------|-------|------------------|
|            |       |              |       |             | P            | OR (95%CI)       | P            | OR (95%CI)       | P     | OR (95%CI)       |
| rs2476601  | 1p13  | PTPN22       | G/a   | G           | 0.38         | 1.15 (0.83-1.59) | 0.36         | 1.19 (0.81-1.74) | 0.87  | 1.05 (0.56-1.97) |
| rs11465804 | 1p31  | IL23R        | T/g   | T           | 0.77         | 1.08 (0.66-1.76) | 0.11         | 1.64 (0.86-3.12) | 0.037 | 0.37 (0.15-0.93) |
| rs2274910  | 1q23  | ITLN1        | C/t   | C           | 0.54         | 0.93 (0.76-1.14) | 0.63         | 0.94 (0.74-1.21) | 0.69  | 0.93 (0.64-1.35) |
| rs9286879  | 1q24  | TNFSF18      | A/g   | G           | 0.88         | 0.98 (0.78-1.24) | 0.45         | 0.90 (0.67-1.20) | 0.41  | 1.19 (0.79-1.80) |
| rs11584383 | 1q32  | C1orf81      | T/c   | T           | 0.67         | 1.04 (0.85-1.28) | 0.38         | 1.12 (0.86-1.46) | 0.59  | 0.90 (0.62-1.31) |
| rs3828309  | 2q37  | ATG16L1      | G/a   | G           | 0.87         | 1.02 (0.83-1.26) | 0.63         | 1.06 (0.83-1.36) | 0.67  | 0.93 (0.64-1.34) |
| rs3197999  | 3p21  | MST1         | G/a   | A           | 0.19         | 0.86 (0.69-1.08) | 0.36         | 0.88 (0.67-1.15) | 0.34  | 0.81 (0.53-1.24) |
| rs4613763  | 5p13  | PTGER4       | T/c   | C           | 0.27         | 0.85 (0.64-1.13) | 0.087        | 0.74 (0.52-1.05) | 0.54  | 1.17 (0.71-1.93) |
| rs2188962  | 5q31  | C5orf56      | C/t   | T           | 0.22         | 0.88 (0.71-1.08) | 0.061        | 0.79 (0.61-1.01) | 0.52  | 1.14 (0.77-1.68) |
| rs10045431 | 5q33  | IL12B        | C/a   | C           | 0.20         | 1.16 (0.93-1.46) | 0.27         | 1.16 (0.88-1.53) | 0.51  | 1.15 (0.76-1.73) |
| rs11747270 | 5q33  | IRGM         | A/g   | G           | 0.55         | 1.12 (0.77-1.65) | 0.26         | 1.32 (0.83-2.11) | 0.60  | 0.84 (0.43-1.62) |
| rs6908425  | 6p22  | CDKAL1       | C/t   | C           | 0.41         | 1.11 (0.86-1.43) | 0.35         | 1.15 (0.85-1.55) | 0.96  | 1.01 (0.63-1.62) |
| rs7746082  | 6q21  | PRDM1        | G/c   | C           | 0.77         | 1.03 (0.83-1.30) | 0.61         | 0.93 (0.71-1.22) | 0.19  | 1.32 (0.88-1.97) |
| rs2301436  | 6q27  | CCR6         | C/t   | T           | 0.48         | 0.93 (0.75-1.15) | 0.95         | 1.01 (0.77-1.32) | 0.21  | 1.27 (0.88-1.83) |
| rs1456893  | 7p12  | IKZF1        | A/g   | A           | 0.81         | 1.03 (0.82-1.30) | 0.33         | 1.14 (0.87-1.49) | 0.28  | 0.79 (0.53-1.20) |
| rs1551398  | 8q24  | TRIB1        | A/g   | A           | 0.46         | 1.09 (0.88-1.35) | 0.60         | 1.08 (0.83-1.40) | 0.56  | 1.12 (0.76-1.67) |
| rs10758669 | 9p24  | JAK2         | A/c   | C           | 0.42         | 1.09 (0.89-1.33) | 0.55         | 1.08 (0.84-1.37) | 0.56  | 1.12 (0.76-1.64) |
| rs4263839  | 9q32  | TNFSF15      | G/a   | G           | <i>0.015</i> | 1.30 (1.05-1.60) | <i>0.045</i> | 1.30 (1.00-1.69) | 0.17  | 1.30 (0.89-1.89) |
| rs17582416 | 10p11 | CUL2         | T/g   | G           | 0.57         | 0.94 (0.77-1.16) | 0.99         | 1.00 (0.78-1.27) | 0.29  | 0.81 (0.55-1.20) |
| rs10995271 | 10q21 | ZNF365       | G/c   | C           | 0.79         | 1.03 (0.83-1.27) | 0.53         | 0.92 (0.72-1.18) | 0.12  | 1.37 (0.92-2.05) |
| rs11190140 | 10q24 | NKX2-3       | C/t   | T           | 0.95         | 0.99 (0.81-1.21) | 0.33         | 1.13 (0.89-1.43) | 0.10  | 0.73 (0.51-1.06) |
| rs7927894  | 11q13 | C11orf30     | C/t   | T           | 0.57         | 0.94 (0.77-1.16) | 0.79         | 1.03 (0.81-1.32) | 0.15  | 0.76 (0.52-1.11) |
| rs11175593 | 12q12 | LRRK2        | C/t   | T           | 0.47         | 0.74 (0.33-1.70) | 0.81         | 1.21 (0.43-3.42) | 0.15  | 0.38 (0.09-1.67) |
| rs3764147  | 13q14 | C13orf31     | A/g   | G           | 0.12         | 0.82 (0.64-1.06) | 0.35         | 0.86 (0.63-1.18) | 0.19  | 0.74 (0.47-1.16) |
| rs2066844  | 16q12 | NOD2         | C/t   | T           | -            | -                | -            | -                | 0.082 | 0.27 (0.06-1.18) |
| rs2066847  | 16q12 | NOD2         | DEL/c | C           | -            | -                | 0.46         | 0.69 (0.26-1.84) | -     | -                |
| rs2872507  | 17q12 | ORMDL3       | G/a   | A           | 0.71         | 1.04 (0.85-1.27) | 0.49         | 1.09 (0.86-1.38) | 0.73  | 0.94 (0.66-1.34) |
| rs744166   | 17q21 | STAT3        | A/g   | A           | <i>0.021</i> | 1.27 (1.03-1.55) | <i>0.011</i> | 1.37 (1.08-1.75) | 0.78  | 1.05 (0.73-1.52) |
| rs2542151  | 18p11 | PTPN2        | T/g   | G           | 0.56         | 1.08 (0.83-1.42) | 0.96         | 0.99 (0.70-1.40) | 0.31  | 1.25 (0.81-1.93) |
| rs1736135  | 21q21 | USP25        | T/c   | T           | 0.37         | 1.10 (0.90-1.34) | 0.87         | 1.02 (0.81-1.28) | 0.16  | 1.32 (0.90-1.92) |
| rs762421   | 21q22 | ICOSLG       | A/g   | G           | 0.70         | 1.04 (0.85-1.27) | 0.72         | 0.96 (0.75-1.22) | 0.21  | 1.27 (0.88-1.84) |

Lower case indicates minor allele at each SNP. Significant P values are reported in italics, with those withstanding Bonferroni correction for multiple tests also in bold type.
